# Supplementary material for: Fluorescent carbon nanoparticles: mimicking hydrogen peroxide properties in a chemiluminescence system
Source: Royal Society of Chemistry journal article supplement (doi:10.1039/c6cc07285b), 2016-01-01
Supplement: c6cc07285b1.pdf [file c6cc07285b1.pdf]

## Supporting Information

### **Fluorescent Carbon Nanoparticle: Mimic of Hydrogen Peroxide Property for Chemiluminescence System**

Xiangnan Dou<sup>a,b</sup>, Yongzan Zheng<sup>a</sup>, Katsumi Uchiyama<sup>b</sup> and Jin-Ming Lin<sup>\*,a</sup>

*<sup>a</sup>Beijing Key Laboratory of Microanalytical Methods and Instrumentation, Department of Chemistry, Tsinghua University, Beijing, 100084, China*

*<sup>b</sup> Department of Applied Chemistry, Graduate School of Urban Environmental Sciences, Tokyo Metropolitan University, Minamiohsawa, Hachioji, Tokyo 192-0397, Japan*

## Experimental Section

**Reagents.** All chemicals used in our work were analytical grade and were used without any purification. diphosphorus pentoxide( $P_2O_5$ ), acetic acid( $CH_3COOH$ ), sodium hydroxide (NaOH), sodium hydrogen carbonate ( $NaHCO_3$ ), sodium bisulfite( $NaHSO_3$ ) were brought from Beijing Chemical Reagent Co. (Beijing, China). 2,2,6,6-tetramethyl-4-piperidine (TEMP), luminol and 2, 2'-azino-bis(3-ethyl-benzothiazoline-6-sulfonic acid) (ABTS) was purchased from J&K Scientific. Ltd (Beijing, China). NaOH solution was prepared freshly before using.

**Apparatus.** Batch CL experiments were carried out with a BPCL luminescence analyzer (Institute of Biophysics, Chinese Academy of Sciences, Beijing, China). The flow injection was performed with a flow CL analyzer (LumiFlow LF 800 detector, NITI ON, Funabashi, Japan). UV-vis spectra were collected by a UV-3900 spectrophotometer (Hitachi, Japan). Emission spectra were measured with a F-7000 fluorescence spectrophotometer (Hitachi, Japan). The Fourier Transform Infrared (FTIR) spectrum was obtained with FTIR spectrometer (Massachusetts, USA). Electron paramagnetic resonance (EPR) spectra were measured on a Model JES-FA200 spectrometer (JEOL, Tokyo, Japan). Transmission electron microscopy image was recorded by a JEM 2010 electron microscope (JEOL, Japan).

**Synthesis of FCNs.** FCNs were synthesized as previously reported. First, 1ml of acetic acid as carbon source was mixed with water (160  $\mu$ L). Then homogeneous mixture solution was quickly added to 2.5 g of  $P_2O_5$  in a 10 ml sample vial without stirring and then sticky brown product was obtained. The as-prepared FCNs were purified by dialysis for 24h(The cut-off of the dialysis membrane equivalent to  $M_w \sim 1000$ ). The FCNs solution was collected in a 25 ml volumetric flask to reserve, which was used as original solution for diluting to different ratio.

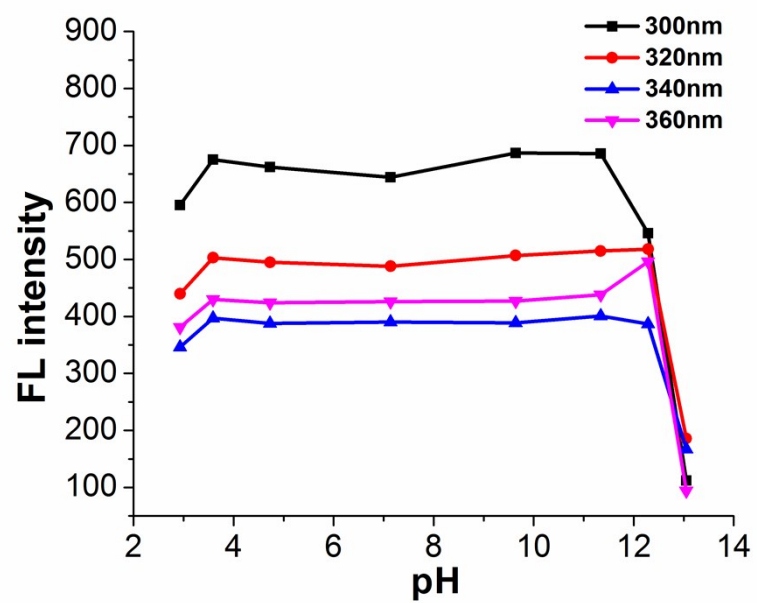

**Figure S1** The FL stability upon pH range of 3-13.

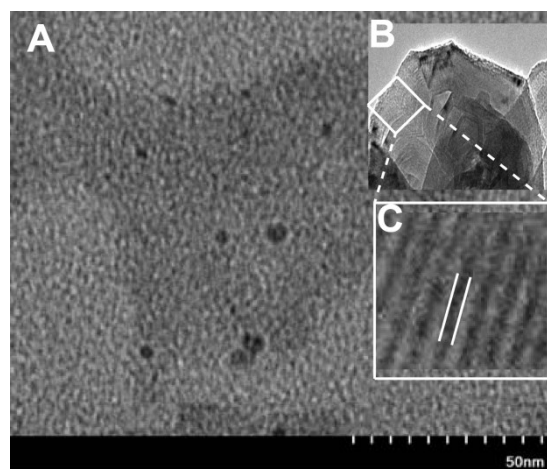

**Figure S2** HRTEM image of the FCNs

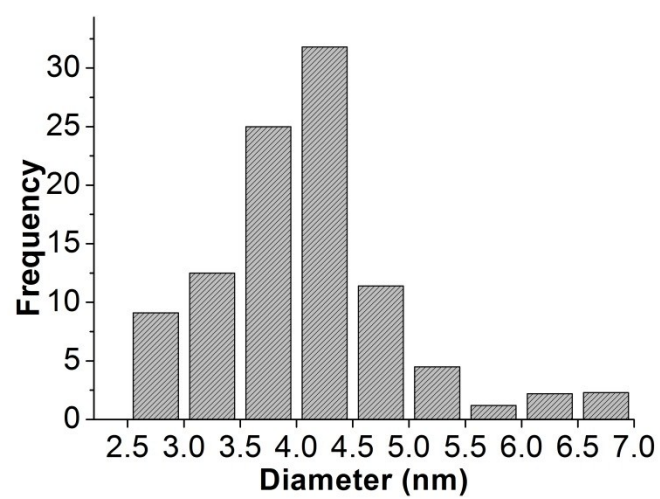

**Figure S3** The image of diameter distribution of FCNs

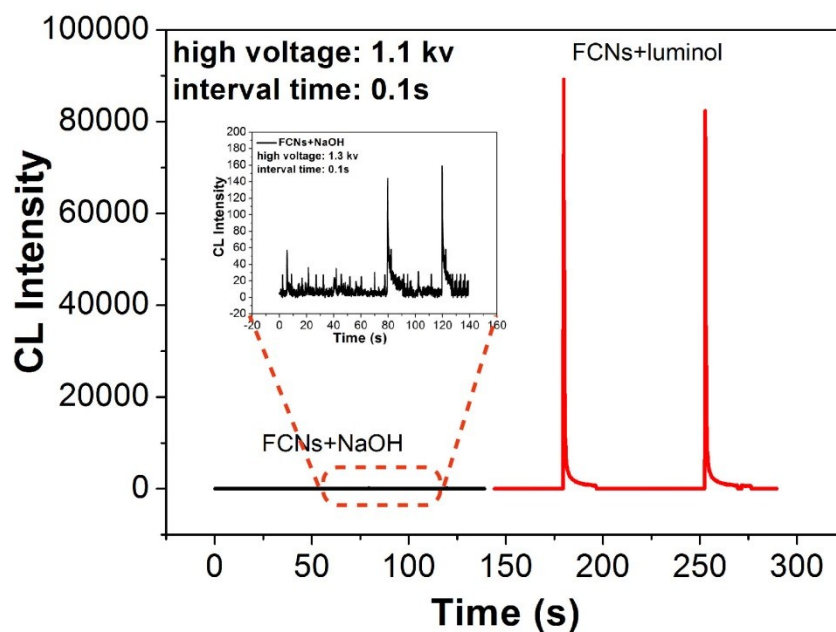

**Figure S4** The comparison of CL signal for FCNs-NaOH and FCNs-luminol system. Conditions: High voltage was -1.1 kV; interval time was set for 0.1 s. The concentration of luminol is  $10^{-5}$  M; The concentration of NaOH is 0.1 M; the FCNs is in the dilution of 1:5000 with water.

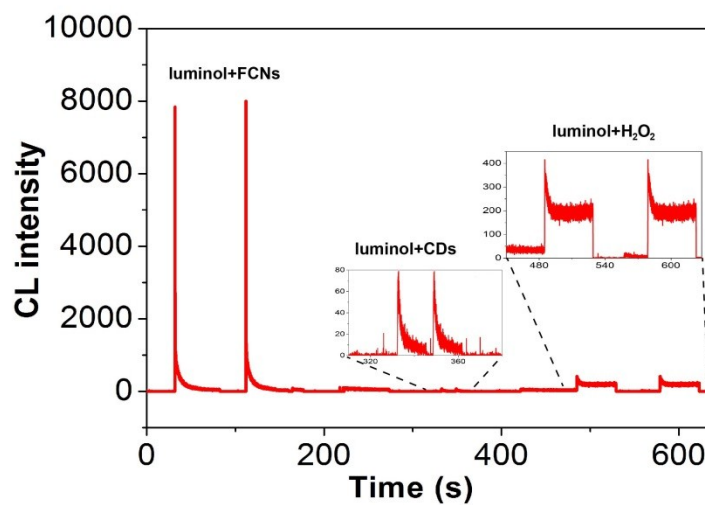

**Figure S5** The CL files luminol-FCNs, luminol-CDs and luminol-H<sub>2</sub>O<sub>2</sub> system with the same NaOH concentration of 0.1M. Conditions: High voltage was -1.2 kV; interval time was set for 0.01 s. The concentration of luminol is 10<sup>-5</sup> M; the FCNs is in the dilution of 1:5000 with water. The CDs is in the dilution of 1:100 with water.

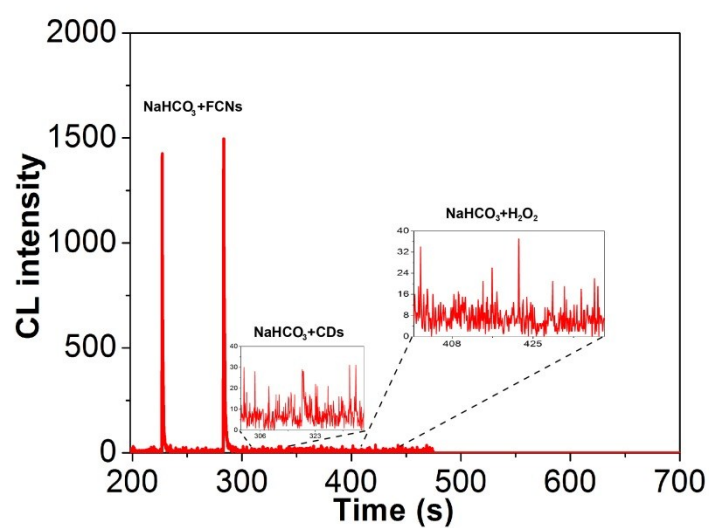

**Figure S6** The CL files NaHCO<sub>3</sub>-FCNs, NaHCO<sub>3</sub>-CDs and NaHCO<sub>3</sub>-H<sub>2</sub>O<sub>2</sub> system with the same NaOH concentration of 0.1M. Conditions: High voltage was -1.4kV; interval time was set for 0.1 s. The concentration of NaHCO<sub>3</sub> is 0.1M; the FCNs is in the dilution of 1:5000 with water. The CDs is in the dilution of 1:100 with water.

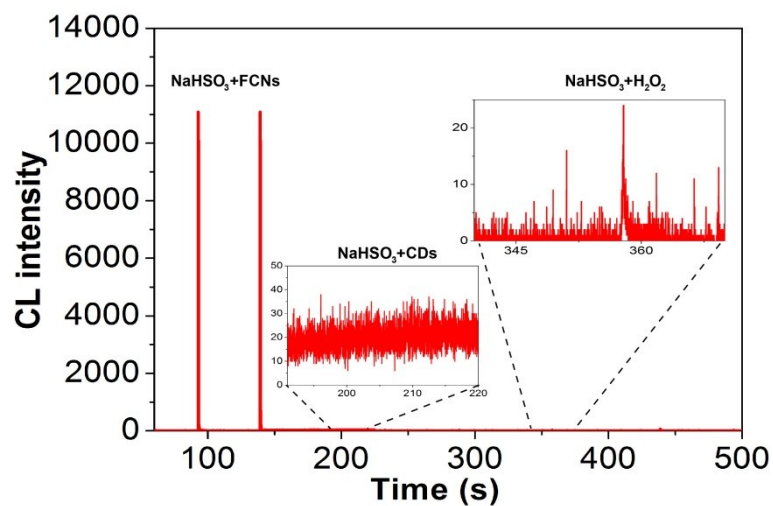

**Figure S7** The CL files NaHSO<sub>3</sub>-FCNs, NaHSO<sub>3</sub>-CDs and NaHSO<sub>3</sub>-H<sub>2</sub>O<sub>2</sub> system with the same NaOH concentration of 0.1M. Conditions: High voltage was -1.3kV; interval time was set for 0.1 s. The concentration of NaHSO<sub>3</sub> is 0.1M; the FCNs is in the dilution of 1:5000 with water. The CDs is in the dilution of 1:100 with water.

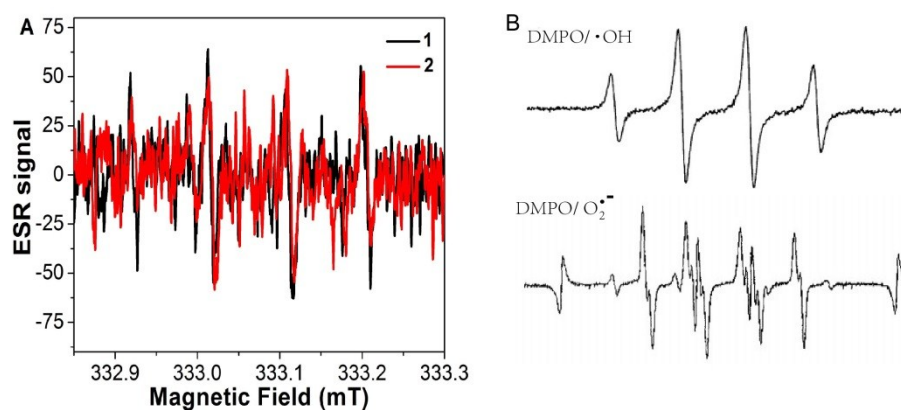

**Fig. S8** (A)ESR spectra of DMPO adduct by  $\cdot\text{OH}$  and  $\text{O}_2\cdot^-$  trapped with DMPO in (1)luminol solution and (2) FCNs-luminol system. (B) The specific ESR spectra of DMPO/ $\cdot\text{OH}$  and DMPO/ $\text{O}_2\cdot^-$  adduct which from [ref. 1](#)(Hui Chen et al. 2010) and [ref.2](#)(Yasuko Noda et al. 1997).

(1) Hui Chen, Ruibo Li, Ling Lin, Guangsheng Guo, Jin-Ming Lin, *Talanta*. **2010**, 81, 1688–1696

(2)Yasuko Noda, Kazunori Anzai, Akitane Marl, Masahiro Kohno, Masashi Shinmei, *Biochem. Mol. Biol. Int.* **1997**, 42, 35-44.

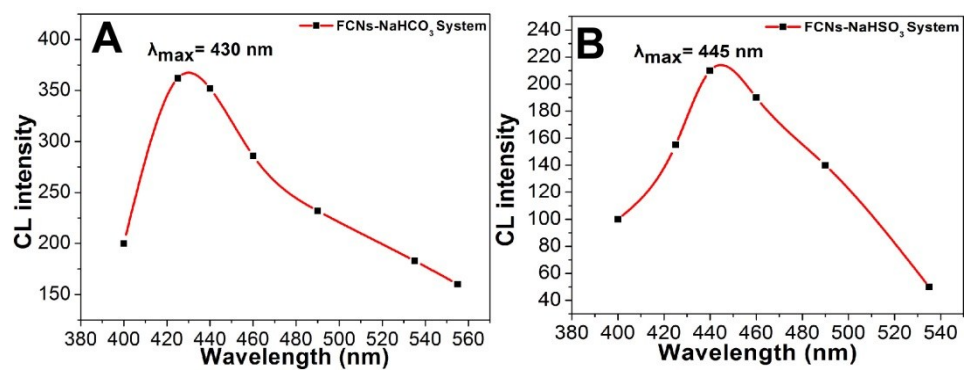

**Fig. S9** The CL spectra of FCNs-NaHCO<sub>3</sub> and FCNs-NaHSO<sub>3</sub> system

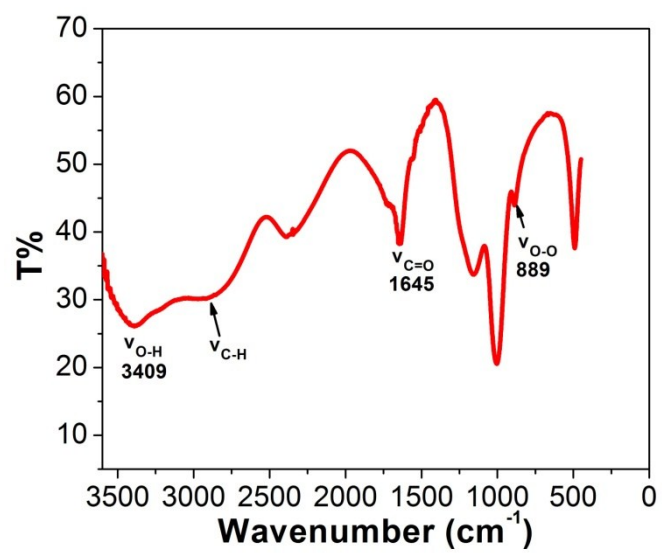

**Figure S10** The FTIR spectra of FCNs solution

| Table S1 Table Inhibition Effects of Organic Compounds (10 <sup>-5</sup> mol/L) on FCNs-Luminol CL System <sup>a, b</sup>                                                                                       |              |                               |              |
|-----------------------------------------------------------------------------------------------------------------------------------------------------------------------------------------------------------------|--------------|-------------------------------|--------------|
| Organic compounds                                                                                                                                                                                               | Quenching, % | Organic compounds             | Quenching, % |
| ascorbic acid                                                                                                                                                                                                   | 92.6         | Pyrocatechol                  | 96.2         |
| L-proline                                                                                                                                                                                                       | 38.9         | Resorcine<br>Phenylenediamine | 95.8         |
| L-cysteine                                                                                                                                                                                                      | 98           | Resorcine                     | 83.4         |
| L-histidine                                                                                                                                                                                                     | 88.7         | DL-Methionine                 | 87.5         |
| 2-aminophenol                                                                                                                                                                                                   | 86           | L(+)-Arginine                 | 69           |
| 4-nitrophenol                                                                                                                                                                                                   | 50           | L-Lysine                      | 58.9         |
| <sup>a</sup> The experiments were carried out with flow injection system.<br><sup>b</sup> Solution condition: the concentration of luminol was 10 <sup>-5</sup> M in 0.1 M NaOH ; FCNs in a dilution of 1:1000. |              |                               |              |

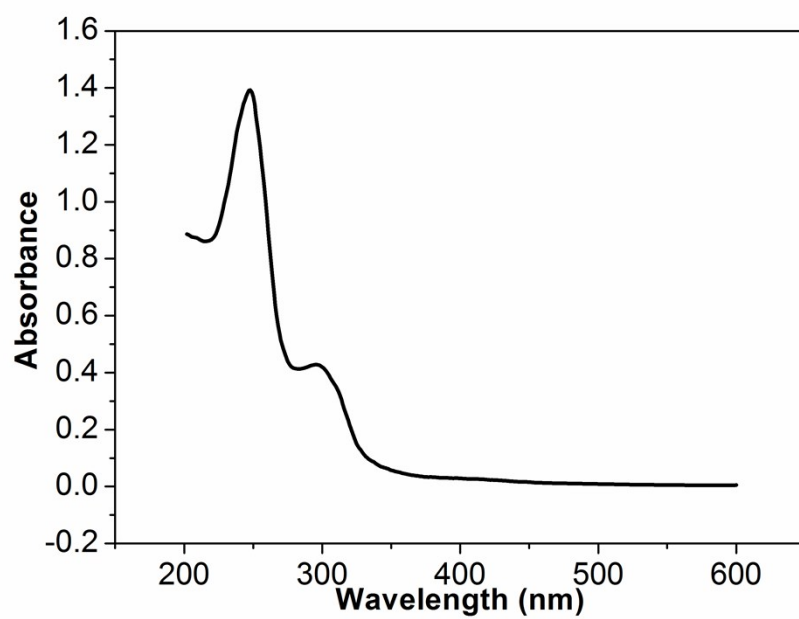

**Figure S11** The UV-vis spectra of FCNs solution
